1 **Interspecies interactions mediated by conductive minerals in the sediments of the**  
2 **ferruginous Lake La Cruz, Spain**

3 **Authors:** Amelia-Elena Rotaru<sup>\*1</sup>, Nicole R. Posth<sup>2</sup>, Carolin R. Löscher<sup>1,3</sup>, Maria R.  
4 Miracle<sup>4,†</sup>, Eduardo Vicente<sup>4</sup>, Raymond P. Cox<sup>1</sup>, Jennifer Thompson<sup>5</sup>, Simon W. Poulton<sup>5</sup>,  
5 and Bo Thamdrup<sup>1</sup>

6  
7 **Affiliations**

8 \*Correspondence: [arotaru@biology.sdu.dk](mailto:arotaru@biology.sdu.dk)

9 †Deceased. This article is *in memoriam* of Maria R. Miracle.

10  
11 <sup>1</sup>Department of Biology, University of Southern Denmark, Campusvej 55, Odense, DK-5230

12 <sup>2</sup>Department of Geosciences and Natural Resource Management (IGN), Geology, University  
13 of Copenhagen, Øster Voldgade 10, 1350 Copenhagen K

14 <sup>3</sup>Danish Institute for Advanced Science, University of Southern Denmark, Campusvej 55,  
15 Odense, DK-5230

16 <sup>4</sup>Department of Microbiology and Ecology, University of Valencia, Av. de Blasco Ibáñez, 13,  
17 46010 València

18 <sup>5</sup>School of Earth and Environment, University of Leeds, Leeds, LS2 9JT, UK

## Abstract

Lake La Cruz is considered a biogeochemical analogue to early Earth marine environments because its water column is depleted in sulfate, but rich in methane and iron, similar to conditions envisaged for much of the Precambrian. In this early Earth analogue environment, we show that conductive particles establish a tight metabolic coupling between electroactive microbial clades. We propose that mineral-based syntrophy is of potential relevance for the evolution of Earth's earliest complex life forms. We show that the anoxic sediment of Lake La Cruz, which is rich in biogeochemically 'reactive' iron minerals, harbors known electroactive species such as *Geobacter* and *Methanothrix*, in addition to other groups which have not been previously associated with an electroactive lifestyle. Slurry incubations on various substrates in the presence of conductive particles showed significant methanogenic activity, whereas incubations with non-conductive glass beads resulted in low methanogenic rates similar to slurries without added particles. In the absence of conductive particles, all tested substrates were metabolized to acetate, which accumulated to ~10 mM. Similar to a previous study on iron-rich Baltic Sea sediments, we observed that conductive mineral additions to La Cruz slurries enabled acetate oxidation, thus preventing acetate accumulation. Acetate oxidation coupled to high methanogenic activity was only maintained in successive mud-free enrichments when these were amended with conductive minerals. In serial mud-free transfers, conductive particles conserved a consortium of *Youngiibacter*-*Methanothrix*, whereas *Youngiibacter* spp. died off in the absence of conductive particles. In contrast, mud-free enrichments without conductive particles ceased any metabolic activity during the second transfers. Syntrophic consortia from this early Earth analogue environment only survived in the presence of conductive particles. Mineral-mediated syntrophy could be one of the earliest evolutionary interspecies associations. Conductive minerals might have fueled metabolic exchange between cells via intercellular electron transfer prompting tight cell-to-cell associations and possibly eukaryogenesis.

## Keywords

*Methanothrix*, *Geobacter*, *Youngiibacter*, magnetite, conductive particles, granular activated carbon, direct interspecies electron transfer, mineral mediated syntrophy, ferruginous lake

## Introduction

It has been proposed that eukaryotic life arose from syntrophic interactions between Deltaproteobacteria and methanogenic archaea (López-García and Moreira, 1999; Martin and Russell, 2003; Moreira and Lopez-Garcia, 1998) in the anoxic and ferruginous (Fe-rich) early Archaean ocean (Crowe et al., 2008). Similar conditions can be found today in the anoxic deeper waters of some lakes (Crowe et al., 2008; Bura-Nakic et al., 2009; Llíros et al., 2015), including Lake La Cruz, Spain (Camacho et al., 2017; Walter et al., 2014). Most studies of these environments have focused on the phototrophic and methanotrophic communities in the water column, yet little attention has been given to either the methanogenic community buried in the sediments or the possible impact of iron-minerals on their physiology. Only recently researchers investigated the methanogenic community from Lake Matano, Indonesia which displayed high methanogenic rates when spiked with the iron-oxide, goethite (Bray et al., 2017), however the possibility of a mineral-mediated syntrophic interaction was not assessed.

Generally, syntrophic associations are carried out indirectly, in which case electron transfer between partners is assisted by diffusible chemicals ( $H_2$ , formate, shuttles). These classical syntrophic interactions require two partners, a bacterium capable of oxidation of complex organics to reduced compounds (i.e.  $H_2$ ), which are then retrieved by a methanogenic archaeon, which reduces  $CO_2$  to methane (Shrestha and Rotaru, 2014). Recent studies have shown that, sometimes, interspecies electron transfer does not require a diffusible chemical carrier. In the absence of a diffusible electron carrier, interspecies electron transfer could occur via conductive particles (magnetite, chars, pyrite) (Chen et al., 2014; Kato and Igarashi, 2018; Liu et al., 2012, 2015; Wang et al., 2018) or directly by forging electric connections via a self-assembled extracellular network of conductive pili and c-type cytochromes between the two syntrophic partners (Rotaru et al., 2014b, 2014a; Summers et al., 2010), the latter being known as direct interspecies electron transfer (DIET). DIET was shown to be accelerated by conductive materials possibly because cells save energy by pausing the production of their own conductive extracellular network (Liu et al., 2015; Wang et al., 2018). Consequently, mineral-mediated syntrophy is energetically more favorable than the usual syntrophic associations.

It has been proposed that Fe-minerals such as pyrite helped nucleate the membranes of the earliest cells (Russell et al., 1994; Wächtershäuser, 1988a). Many membrane bound proteins involved in electron transfer through the membranes of present day cells contain FeS centers (i.e. ferredoxins). It is therefore likely that some of the earliest FeS proteins might have played a role in electron transfer between cells.

It has been speculated that conductive-minerals also mediate the interaction between protocells with leaky cell walls and their environment, such as were probably present in the

mineral-rich Archaeal ocean (Lane and Martin, 2012). Interactions between cells with different metabolisms is thought to be at the origin of eukaryogenesis, as such cells compartmentalized the functions within the eukaryotic cell (López-García and Moreira, 1999; Martin and Russell, 2003; Moreira and Lopez-Garcia, 1998). In the present study, we have investigated the conductive iron-mineral dependency of interspecies interactions between bacteria and methanogens from the sediments of the Fe-rich, stratified Lake La Cruz. Specifically, we were interested in whether reactive Fe minerals would support conductive-mineral mediated interspecies interactions. As the biogeochemical setting of the lake makes it a prime early analogue (Walter et al., 2014, Camacho et al., 2017), we also discuss the context of today's mineral-mediated syntrophy as a relic of ancestral associations.

## Materials and methods

### Sampling and incubations

During an expedition at Lake La Cruz in central Spain (Fig. 1) in September 2014, we sampled the lake water and sediment. Lake La Cruz is a permanently stratified, meromictic, doline lake located in a karst region in the Iberian Mountain Range. The lake is circular with a diameter of 122 m. At the time of sampling, the maximum depth was 20 m and the chemocline was at ~12 m depth. Water samples were pumped from sampling depths above, within, and below the chemocline at the deepest part of the lake from a boat tethered from shore to shore of the lake. The pumping apparatus was designed to withdraw water samples without contact with the atmosphere, and both the apparatus and sampling protocol have previously been described in detail (Miracle et al., 1992; Posth et al., 2017). Samples were gathered and fixed directly on the boat and stored until analysis in the lab.

Three sediment cores were collected from the center and deepest part of the lake (coordinates: 1° 28'17" West; 39° 59'20 North, Fig 1) using a sediment corer (Kajak sediment core, KC Denmark). The cores (50 length × 7 cm diameter) were sealed without air bubbles as they were pulled up from depth with rubber stoppers immediately inserted to avoid exposure to the atmosphere. Within 24 hours of sampling, the sediment was partitioned into depth intervals, and fixed for biogeochemical and molecular analyses inside an N<sub>2</sub>-filled inflatable glove bag, as described in detail below.

For downstream incubations, sediment from 0-15 cm depth was sampled and placed in Duran bottles secured with butyl-rubber stoppers, with a headspace of 2 bars N<sub>2</sub>:CO<sub>2</sub> 80:20 mix. Samples were stored at 4°C until later used for incubations.

Slurries were prepared in an N<sub>2</sub>-filled anaerobic chamber in the laboratory. For these slurries, we used 3 mL cut-off syringes to distribute 2.5 mL of sediment into 20 mL gas-tight vials filled with 7.5 mL of medium, either modified DSM 120 or DSM 334. Modified DSM 120 medium was prepared as described previously (Rotaru et al., 2014b), but with 0.6 g/L

NaCl. Three successive ten-fold dilutions of the sediment slurries led to essentially mud-free enrichments in which sediment particles could not be detected visually or by microscopy. Before inoculation, the complete medium, which lacked the substrate and (semi)conductive minerals, was dispensed anaerobically by syringe into sterile degassed vials with or without minerals prepared as below.

Two electrically conductive particle types (granular activated carbon and magnetite) were selected to be tested because they were previously confirmed to stimulate DIET in methanogenic co-cultures (Liu et al., 2012; Zheng et al., 2017). Granular activated carbon (GAC, Sigma Aldrich) had a particle size between 180 and 300 µm diameter and estimated conductivity of circa 1000 S/m (Kastening et al., 1997), and magnetite (Sigma Aldrich) with particles less than 5 µm diameter, and estimated electrical conductivity ranging between 0.1 and 1 S/m (Blaney, 2012; Rochelle and Schwertmann, 2003). Both materials have conductivities similar or higher than the pili that carry out extracellular electron transfer in *Geobacter sulfurreducens* (5 S/m (Adhikari et al., 2016)). 0.1 g/L of each material was weighed, added to vials, overlaid with 200 µl ultrapure water for wet sterilization, degassed for 3 minutes with N<sub>2</sub>:CO<sub>2</sub> 80:20 mix, and autoclaved at 121°C for 25 min. Control experiments with non-conductive particle were carried out with acid-washed glass beads (less than 105 µm diameter) instead of conductive minerals. Substrates (5 mM glucose, 5 mM sodium butyrate, 10 mM sodium acetate, 10 mM ethanol) were added to media from sterile anoxic 1M stocks using aseptic and anaerobic techniques. Control experiments without electron donors were carried out in order to identify whether the organics in the sediment served as substrates for methanogenesis. All incubations were carried out at room temperature (20-23°C) in triplicate, unless otherwise noted.

Gas samples were withdrawn, stored anaerobically and then analyzed for methane on a Thermo Scientific gas chromatograph (Rotaru et al., 2018). To test for short chain volatile fatty acids (SCVFA) we used high performance liquid chromatography (HPLC) as described elsewhere (Rotaru et al., 2018).

### Biogeochemistry

For biogeochemical parameters, we took water column samples at various depth intervals and sampled the sediment obtained via the gravity corer. Geochemical parameters of relevance to this work were methane, soluble ferrous iron, and particulate reactive iron mineral species. We will use the term reactive iron species to refer to oxalate, dithionite and HCl soluble iron oxides and sulfides (Phillips and Lovley, 1987; Poulton et al., 2004; Raiswell and Canfield, 1998).

Water column methane was sampled from the pumping apparatus through isoversinic tubing into 20 mL glass, GC vials (Supelco, Sigma-Aldrich). For each sampling depth,

triplicate 5 mL samples were added to GC vials pre-doped with 10 mL 2 N NaOH to retain CO<sub>2</sub> in the liquid phase. The vials were sealed with butyl-viton rubber stoppers, and stored upside down in the dark at 4°C until analysis.

Sediment methane concentrations were determined from sediment slices extracted every 2 cm in an anoxic glove bag filled with N<sub>2</sub> gas.

Our measurements of available electron acceptors at the sediment boundary layer corroborated previous investigations during summer months at this lake (Camacho et al., 2017; Miracle et al., 1992; Walter et al., 2014) and showed a depletion of sulfate and Fe<sup>3+</sup> (<10 µM sulfate, <1 µM Fe<sup>3+</sup>) and no detection of oxygen and nitrate. Thus sediments mainly rely on methanogenesis for decomposition of organic matter below the water-sediment boundary, similar to previous observations on this lake during summer months (Miracle et al., 1992; Walter et al., 2014). For sedimentary methane determination, sliced sediment was filled into glass GC vials, to which 1 M (2.5%) NaOH was added in order to stop any additional microbial activity. The vials were capped with butyl-viton stoppers, crimped, and inverted until lab analysis. Sedimentary methane concentrations were determined on a Perkin Elmer GC, as previously described (Rotaru et al., 2018).

Porewater was analysed for reduced iron concentrations at ~2 cm depth resolution after extraction using Rhizons (Rhizosphere; pore size 0.2 µm) inside a glove bag with an N<sub>2</sub>-atmosphere. Dissolved Fe<sup>2+</sup> was determined immediately using the ferrozine assay (Lovley and Phillips, 1987; Phillips and Lovley, 1987; Stookey, 1970; Viollier et al., 2000).

To determine iron mineral speciation, sediment was subsampled from each 2 cm-depth interval and stored at -20°C. Reactive iron species (dithionite and HCl soluble iron species) (Phillips and Lovley, 1987; Poulton et al., 2004; Raiswell and Canfield, 1998) were identified from freeze-dried samples stored at -20°C by applying a modified sequential iron extraction procedure (Poulton and Canfield, 2005). In the first step, a room temperature 0.5 N HCl extraction was applied to dissolve poorly crystalline iron oxides such as ferrihydrite, surface absorbed Fe<sup>2+</sup>, iron carbonate minerals such as siderite, and acid volatile iron monosulfides (Zegeye et al., 2012). Subsequently, a pH 4.8 sodium dithionite extraction was employed to dissolve crystalline ferric oxide minerals such as goethite and hematite, followed by an oxalate extraction to dissolve magnetite (Poulton and Canfield, 2005). The total concentration of iron dissolved in each operationally defined extraction phase was determined by flame atomic absorption spectroscopy (AAS). For the 0.5 N HCl extraction, dissolved Fe<sup>2+</sup> was also measured immediately via the ferrozine assay (Lovley and Phillips, 1987; Phillips and Lovley, 1987; Stookey, 1970; Viollier et al., 2000). Extraction of this Fe<sup>2+</sup> from the total Fe determined for this extraction by AAS gave the Fe<sup>3+</sup> concentration associated with poorly crystalline iron oxides such as ferrihydrite. Iron sulfide phases were determined via a two-step

sequential extraction procedure (Canfield et al., 1986). Acid volatile sulfide minerals (FeS) were determined by extraction with hot 6 N HCl under N<sub>2</sub>, with the released sulfide trapped as Ag<sub>2</sub>S. Pyrite (FeS<sub>2</sub>) was then determined after addition of chromous chloride, with the sulfide again trapped separately as Ag<sub>2</sub>S. After filtration, the concentrations of Fe in FeS and FeS<sub>2</sub> were determined stoichiometrically. The concentration of Fe present as FeS was subtracted from the Fe<sup>2+</sup> concentration determined by the 0.5 N HCl extractions, to give surface reduced and carbonate-associated Fe<sup>2+</sup>. Replicate extractions gave a RSD of <5% for all phases.

### Scanning electron microscopy

Samples from the water column were preserved in 4% formalin, filtered on Nucleopore carbonate filters, with a pore size of 0.2 µm, and dehydrated in 20 minute steps with ethyl alcohol (30%, 50%, 70%, 90% and two times 100%). Then samples were critical point dried prior to palladium/gold sputter coating and visualization on a Hitachi S-4800 FE scanning electron microscope ran at an electron beam acceleration voltage of 10kV.

### Molecular analyses

For molecular analyses we sampled 2 mL of sediment at 2 cm depth resolution using cut-off syringes inside a N<sub>2</sub>-filled glove bag. Sediment was pooled together every 4 cm and fixed with MoBio RNAlater 1:1 v/v (Rotaru et al., 2018). Prior to DNA extractions, most of the RNAlater was removed by centrifugation. For DNA extraction we used the top 16 cm of sediment from triplicate cores. Extractions were carried independently for each core with the MoBio RNA Soil kit coupled to the MoBio complementary DNA Soil kit, following the manufacturer's protocol. DNA was quantified using a Nano Drop prior to downstream applications. The DNA extracted from each core was amplified with the following primer pair S-D-Arch-0519-a-S-15/ S-D-Bact-0785-b-A-18, which according to Klindworth et al. (2013), was the best for MiSeq amplicon sequencing, targeting more than 89% of Bacteria and more than 88% of Archaea. PCR amplification and indexing (using Nextera XT index kit, Illumina) of the PCR products for the triplicate samples was conducted following the Illumina 16S rRNA gene amplicon sequencing protocol (Illumina, USA). The DNA samples were then sequenced using ×300 PE MiSeq sequencing approach at Macrogen ([www.macrogen.com](http://www.macrogen.com)), using Illumina's protocol. The sequences generated circa 1 million reads for each core, which were imported into CD-HIT-OTU to remove noisy data and clustered into OTUs, using a 97% species cutoff. For taxonomy and diversity analyses, clean and clustered OTUs were analyzed using QIIME (Caporaso et al., 2010), against the Ribosomal Database Project database



version 11. Alpha rarefaction analyses showed sufficient coverage of the diversity in all three sediment cores.

DNA extractions from mud-free incubations were performed using the MasterPure DNA purification kit as previously described (Rotaru et al., 2014b). Amplification of bacterial (27F, 5'-AGAGTTTGATCMTGGCTCAG and 1492R, 5'-TACCTTGTTACGACTT) and archaeal (344F – 5'-ACGGGGYGCAGCAGGCGCGA –3' and 1059R – 5'-GCCATGCACCWCCTCT-3') 16S rDNA sequences, library preparation, and 16S rRNA gene sequencing, was performed as previously described (Rotaru et al., 2018). Maximum likelihood phylogenetic trees were constructed using Geneious (Kearse et al., 2012). Sequence files can be found at NCBI under Bioproject ID: PRJNA (in the process of submission).

## Results and discussion

Our hypothesis was that the iron-rich Lake La Cruz would be the breeding ground for conductive, mineral-based syntrophy (Rotaru et al., 2018). We discovered that microorganisms enriched from Lake La Cruz carried out syntrophic degradation strictly dependent on conductive mineral additions and were unable to carry unaided DIET associations.

**Geochemistry.** We expected to find a niche for DIET/conductive-particle mediated IET in this Fe-rich methanogenic lake resembling the ocean in the Precambrian. La Cruz sediments displayed high methane concentrations in the top 15 cm, along with a significant proportion of reactive iron species (~70% of the total Fe content) (Thompson 2018), which is very high relative to normal non-ferruginous aquatic environments (Poulton and Raiswell, 2002; Raiswell and Canfield, 1998). During this sampling campaign, the sediments were overlain by ~10 m of anoxic water (Fig. 1). During summer months, the lake is known to persistently have a 4-5 m monimolimnion zone above the sediment, which is rich in Fe<sup>2+</sup> (Vincente and Miracle, 1988). In our study we also noticed a strong methane supersaturation near the bottom, where the methane concentration reached 4 mM, similar to concentrations in the surface sediment (Fig. 2). Gas ebullition from the deep water table during sampling and oftentimes gas bubbles, mainly consisting of methane and carbon dioxide (Camacho et al., 2017), percolated through the surface of the lake from the middle, as documented by a ecogram of the lake (Fig. 1d). Previous studies suggested that the sediment is the source of water-column methane (Oswald et al., 2016). Indeed we observed that sediment methane concentrations were highest in the top centimeters of the sediment (Fig. 2). Methane concentrations were also high in the water column (17-20 m), indicating methanogenesis occurs in the bottom waters as well as the top layers of the sediment (Fig. 2).



Similar to previous studies (Camacho et al., 2017, Oswald et al., 2016), dissolved  $\text{Fe}^{2+}$  builds up below the chemocline to reach concentrations of  $\sim 250 \mu\text{M}$  above the sediment-water interface. In the sediment, dissolved  $\text{Fe}^{2+}$  concentrations continue to increase (Thompson 2018), reaching a peak of  $>1000 \mu\text{M}$  at a depth of  $\sim 22 \text{ cm}$ . These high dissolved  $\text{Fe}^{2+}$  concentrations in the water column and sediment porewaters are similar to those found in other iron-rich lakes (Bura-Nakic et al., 2009; Crowe et al., 2011; Nordi et al., 2013; Vincente and Miracle, 1988). The La Cruz sediments were high in TOC (average =  $6.68 \pm 2.0 \text{ wt } \%$ ), and carbonate minerals (average =  $9.46 \pm 1.3 \text{ wt } \%$  inorganic C) which diluted the total Fe-content to  $1.06 \pm 0.18 \text{ wt } \%$  on average (Thompson, 2018). This is significantly lower than the average global total Fe content of riverine particulates supplied to oceans and lakes ( $4.49 \text{ wt } \%$ ; Poulton and Raiswell, 2002). Proportionally, however ‘reactive’ Fe phases (non-sulphidized  $\text{Fe}^{2+}$ , Fe-oxides, Fe-sulfides) were abundant ( $70 \pm 8\%$ ; Thompson, 2018) relative to the total Fe content of the sediment, of which only  $18 \pm 5\%$  was sulfur bound (pyrite, other Fe-S minerals). Nevertheless, iron-oxide concentrations were rather low, with magnetite Fe accounting for less than  $0.1\%$  of the total Fe-content in this sediment. Other Fe oxide minerals accounted for  $\sim 10\%$  of total Fe on average. Thus, non-sulphidized particulate Fe(II) was the dominant reactive Fe pool ( $\sim 60\%$  on average).

Some of the iron minerals (Fe-sulfides and Fe-oxides) found in the sediments of lake La Cruz are electrically conductive (Fig. 3), of which magnetite and iron sulfides were documented to facilitate mineral mediated syntrophy (Kato and Igarashi, 2018; Liu et al., 2012, 2015; Rotaru et al., 2018; Zheng et al., 2017). Fe-sulfides, like pyrite were also shown to aid long-range extracellular electron transfer from cells (Kondo et al., 2015) or enzymes (Mahadevan and Fernando, 2018) to electrodes. Moreover La Cruz sediments also contain coal particles (Romero-Viana et al., 2011), which are conductive (Fig. 3). Indeed it has been documented that conductive carbon materials (i.e. granular activated carbon) facilitated mineral mediated syntrophy as effectively as conductive Fe-minerals (Liu et al., 2012; Rotaru et al., 2018).

***In situ* bacterial diversity – with focus on described electrogens.** We therefore anticipated that electrically conductive particles inherent to La Cruz sediments would facilitate mineral mediated interactions between electrogens and electrotrophic methanogens in this lake sediment. Indeed, our data demonstrate that the community harbours organisms affiliated to groups of electrogens including *Geobacter* (Fig. 4), and to DIET-methanogens including *Methanotrix* (Fig. 4). *Geobacter* and *Methanotrix* have previously been shown to carry out direct interspecies electron transfer in laboratory co-cultures (Rotaru et al., 2014a), and have been found to co-exist in several man-made environments, such as rice paddies (Holmes et al., 2017) and anaerobic digesters (Morita et al., 2011; Rotaru et al., 2014a). In this study we show that bacteria affiliated to known electrogens/iron-reducers like *Geobacter* ( $0.6\%$  of all

Bacteria), *Thiobacillus* (0.2% of all Bacteria), *Desulfobacterium* (0.4% of all Bacteria), and *Anaerolinea* (0.1% of all Bacteria) co-exist with *Methanothrix* in Lake La Cruz sediments (Fig. 4). Together, all of these putative electrogens/iron reducers were represented in Lake La Cruz sediments, summing up to circa 1% of all Bacteria. Previously, members of these four genera, *Geobacter*, *Thiobacillus*, *Desulfobacterium*, *Anaerolinea*, were shown to be capable of extracellular electron transfer to and/or from electrodes or metallic iron (Dinh et al., 2004; Gregory et al., 2004; Kawaichi et al., 2018; Nakasono et al., 1997; Pous et al., 2014; Rotaru et al., 2015), as well as iron-minerals (Bosch et al., 2012; Kawaichi et al., 2013; Lovley et al., 1993; Rotaru et al., 2015). The first two, *Geobacter* and *Thiobacillus* can also interact by DIET with other cells (Kato et al., 2012; Rotaru et al., 2014b, 2014a; Summers et al., 2010), and this interaction has been shown to be expedited in the presence of conductive particles (Chen et al., 2014; Kato et al., 2012; Liu et al., 2012, 2015; Rotaru et al., 2014b; Zheng et al., 2017). It is therefore possible that all of these electrogenic species compete for the electron uptake of electrotrophic methanogens.

However, one of the most abundant genera in these sediments was *Smithella* (2.6% of all Bacteria), which were also potentially electroactive and may carry DIET interactions with *Methanothrix* in an alkane-degrading consortium (Embree et al., 2014). Therefore, *Smithella* may establish a DIET-association with *Methanothrix* from Lake La Cruz sediments (see Archaea community below). Members of *Verrucomicrobia* were also very well represented (circa 4.6% of all Bacteria) similar to what has been observed for 90% of several lake sediments (He et al., 2017). *Verrucomicrobia* were recently proposed to carry extracellular electron transfer due to their genetic make-up, which comprises the appropriate porin systems and membrane-associated c-type cytochromes (He et al., 2017). It is also possible that *Verrucomicrobia* play a role in mineral mediated interspecies interactions. Nevertheless, *Verrucomicrobia* has never been shown to have the ability to interact syntrophically or to carry out extracellular electron transfer in laboratory cultures, and thus this predicted physiology requires future investigation. Some of the most abundant phyla were Bacteroidetes (10.8% of the Bacteria), and Firmicutes (2.5% of all Bacteria) (Fig. 4).

**In situ archaeal diversity.** *Euryarchaeaota* accounted for more than half of the Archaea represented through amplicon sequencing (Fig. 4). Here, we show that in the sediments of Lake La Cruz, *Methanothrix* co-existed with electrogens (*Geobacter*, *Thiobacillus*, *Desulfobacterium*, and *Smithella*). Besides the acetoclastic/DIET-associated *Methanothrix* (3.7% of all Archaea), we identified canonical hydrogenotrophic-methanogens belonging to *Methanoregula* (2.5% of all Archaea), and very low numbers of *Methanobacterium* (0.2% of all Archaea). The most abundant Archaea were the deep-branching *Methanomassilicoccus* (40.6% of all Archaea). The role of *Methanomassilicoccus* in sedimentary methanogenesis is

not well understood since their only cultivated species-representative, *M. luminyiensis*, is a human-gut isolate strictly capable of H<sub>2</sub>-dependent methylotrophic methanogenesis, but incapable of CO<sub>2</sub>-reductive methanogenesis or acetoclastic methanogenesis (Dridi et al., 2012a). Besides their documented presence in the human gut (Adam et al., 2017; Dridi et al., 2012b), *Methanomassiliicoccus* species have also been found in the guts of insects (Paul et al., 2012) and animals (Raymann et al., 2017; Salgado-Flores et al., 2018; Söllinger et al., 2016), anaerobic digesters (Chojnacka and B, 2015; Kuroda and Hatamoto, 2015), hydrothermal springs (Coman et al., 2013; Merkel et al., 2015, 2016), wetlands (Söllinger et al., 2016), subsurface aquifers and soils (Kadnikov et al., 2017; Rout et al., 2015), and riverine and marine sediments (Guo et al., 2018; Nunoura et al., 2016; Rotaru et al., 2018; Vigneron et al., 2016). *Methanomassiliicoccus* was also one of the most abundant genera of methanogens, not only in the iron-rich sediments of Lake La Cruz, but also in Baltic Sea sediments that are potential niches for conductive particle-mediated syntrophy (Rotaru et al., 2018). It is possible that *Methanomassiliicoccus* is involved in electroactive interactions via minerals, especially taking into account that this group was recently associated with electroactive communities abundant on electrodes from bioelectrochemical systems set up with inoculums from soils (Ahn et al., 2014) and anaerobic digester sludge (Park et al., 2018).

Among the methanogens detected in La Cruz sediments, only species of *Methanothrix* have been previously shown to establish DIET-associations with *Geobacter* species (Holmes et al., 2017; Morita et al., 2011; Rotaru et al., 2014a; Wang et al., 2016). *Methanothrix* was earlier suggested to carry out DIET with *Smithella* (Embree et al., 2014), but the latter has never been shown to be capable of mineral-mediated or direct electron transfer. In a previous study, we have shown that a *Methanothrix*-species from the Baltic did not establish a mineral-mediated interaction with Baltic-*Geobacter*, but were instead competitively excluded by a *Methanosarcina*-*Geobacter* consortium, which carried a mineral-mediated syntrophic association (Rotaru et al., 2018). However, although *Methanosarcina* is a very effective DIET partner (Rotaru et al., 2014b, 2015) and mineral-syntrophy partner (Chen et al., 2014; Liu et al., 2012; Rotaru et al., 2018; Wang et al., 2018) they were poorly represented in La Cruz sediments (Fig. 4).

# **High methanogenic activity could only be maintained by conductive particles.**

In order to determine the effect of conductive particles on the Lake La Cruz methanogenic community, we compared incubations with or without additional conductive particles. These incubations showed that the methanogenic community was strictly dependent on the addition of conductive particles and independent of the type of substrate, conductive particle, or freshwater medium tested (Fig. 5). Incubations with conductive particles showed 2-4 fold increases in methanogenic rates (0.2-0.7 mM/day, depending on substrate) over incubations

with non-conductive glass beads or without particle-amendment (0.09 to 0.18 mM/day, depending on the substrate). Moreover, high methanogenic activity was maintained in subsequent incubations *only if* conductive particles were added (Fig. 5). Cultures without conductive particles could not sustain methanogenesis for more than one subsequent transfer. This indicates a strict dependency of the enriched methanogenic community on conductive particles.

We observed that all tested substrates were transiently converted to acetate, which was converted quickly to methane in the presence of conductive particles, whereas acetate accumulated in the absence of conductive particles (Fig. 5). This is likely due to higher rates of acetate oxidation prompted by the addition of conductive particles, similar to previous observations of Bothnian Bay sediments where syntrophic acetate oxidation (SAO) relied on conductive minerals (Rotaru et al., 2018).

We determined which organisms were enriched on acetate with or without conductive particles. For this we compared the acetate fed communities exposed to two types of conductive particles (GAC and magnetite) to a community exposed to no conductive particles. We determined that *Youngiibacter* and *Methanothrix* methanogens dominated the enrichments amended with both types of conductive particle (Fig. 6). On the other hand, in controls without conductive particles, after only one single transfer *Youngiibacter* could not be detected. In the absence of conductive particles methane production only occurred slowly for one transfer and in this case *Methanothrix* co-existed with *Clostridium* (Fig. 6).

*Youngiibacter* was only found in enrichments with conductive particles and its presence could be associated with rapid acetate consumption coupled to methane production (Fig 5). We therefore anticipate that *Youngiibacter* plays a role in conductive-particle mediated syntrophy. Nevertheless, until now little is known about this group of Firmicutes, and only recently two species of *Youngiibacter* have been described (Lawson et al., 2014; Tanaka et al., 1991), of which one is associated with fermentation of organics on coal surfaces during coal conversion to natural gas (Lawson et al., 2014). Coal, similar to activated carbon, is electrically conductive (Duba, 1977). Moreover, *Methanothrix* have been also found associated with coal conversion to natural gas (Beckmann et al., 2011; Lawson et al., 2014). It is therefore possible that *Youngiibacter* and *Methanothrix* play a role in conductive particle-mediated syntrophy in coal beds, and as well in Lake La Cruz sediments. However, a syntrophic association between *Youngiibacter* and *Methanothrix* has not been described before. We suggest that *Youngiibacter* released electrons from substrate/acetate oxidation onto conductive minerals that are then used as a source of electrons for *Methanothrix* in order to reduce CO<sub>2</sub> to methane. It is possible that *Youngiibacter* releases electrons extracellularly using a similar mechanism to that described for *Geobacter* namely a

network of outer membrane *c*-type cytochromes and pili (Shrestha et al., 2013). During DIET, OMCs were not as necessary for a donor *Geobacter* strain to carry substrate oxidation coupled with extracellular electron transfer and respiration, since OMCs could be completely replaced by the conductive iron oxide, magnetite (Liu et al., 2015). Instead, when it plays the role of electron donor *Geobacter* seems to necessitate *e*-pili for long range electron transfer to partner cells, as exemplified in a recent study (Ueki et al., 2018). In agreement with previous observations in *Geobacter* (Ueki et al., 2018), *Youngiibacter* might employ type IV pili for EET to partner *Methanotrix*. *Youngiibacter*'s type IV pili gene sequence (T472\_0202395) differs significantly from that of *Geobacter* species, yet it has a high content of aromatic aminoacids (10.3%) which could give this organism an advantage to carry EET (Walker et al., 2018). It is possible that conductive particles ornate the pili of *Youngiibacter* in a similar way to how they do for *Geobacter* (Liu et al., 2015; Wang et al., 2018) facilitating electron transfer to syntrophic partner methanogens.

### **Conductive-particle mediated syntrophy**

Syntrophy mediated by conductive particles could occur in three different ways (Fig. 7). A first mode of action includes electrogens with limited expression of surface cytochromes whose role would be replaced with that of conductive minerals (pyrite, pyrrhotite, magnetite, goethite) found in sediments (Fig. 7a). Molecular and microscopic evidence for this type of association has been brought by studies in laboratory *Geobacter* co-cultures provided with magnetite (Liu et al., 2015). A second possibility is that cells plug into macro-sized conductive rocks (i.e. iron/manganese-nodules) with one cell releasing electrons onto the rock and the other receiving electrons (Fig. 7b). Evidence for such interactions was previously obtained in laboratory co-cultures with macro-sized conductive chars. In this case, using SEM, it was shown that the electrogen/*Geobacter* cells did not require direct contact to the electrograph/*Methanosarcina* yet the conductive surface facilitated the syntrophic association (Chen et al., 2014; Liu et al., 2012). The third possibility (Fig. 7c), is that membrane-bound proteins facilitate the precipitation of Fe<sup>2+</sup>-ions, i.e., with thiol groups (Milner-White and Russell, 2005) to form a conductive surface-conduit surrounding the cell. Extracellular electron transfer between such mineral-coated cells has been proposed (Kato et al., 2012), but has not been confirmed. However, this could be a possibility for microbes without an extracellular apparatus for electron transfer to partner cells.

It is plausible that mineral-mediated interactions preceded in evolutionary terms the interspecies electron transfer interactions based on diffusible chemicals, which require complex enzymes and cell-bound electrical conduits. Primordial protocells had not developed enzymatic machineries to maintain redox and proton gradients across cell membranes (Martin et al., 2003; Russell et al., 1990, 1994; Wächtershäuser, 1988b). It has



therefore been suggested that minerals, which can uphold voltage differences, such as FeS/pyrite, might have helped nucleate the earliest membranes, playing the role of early membrane-bound catalysts, instead of electron transport chain enzymes today (Martin et al., 2003). Later, the high reactive iron content of the Archaean ocean could have promoted the formation of proteins with Fe-S centers which are required and abundant in redox proteins of methanogens (Liu et al., 2010). Here, we propose that primitive cells with leaky membranes (Lane and Martin, 2012), allowed easy electron transfer via conductive minerals permitting energy exchange between separate metabolic protocell entities. Thus conductive particles could have fostered the earliest interspecies interactions in the methanogenic and iron-rich Early Earth oceans, and possibly nurtured adaptation of interspecies associations pre-eukaryogenesis.

## Conclusion

In conclusion, we show that the sediment of an early Earth ocean analogue is the niche for syntrophic associations dependent on conductive particles. *Only if* conductive particles were provided, could syntrophic bacteria coupled to methanogens oxidize their substrates. Thus, only in incubations with conductive particles members of the genus *Youngiibacter* were identified to co-exist with *Methanothrix*. Incubations without conductive particles resulted in the disappearance of *Youngiibacter*, and one transfer later to the demise of the methanogenic community. These data indicate that conductive particles were required to aid the pairing of the metabolism of *Youngiibacter* with that of *Methanothrix*, which sustained high rates of methanogenesis in this early Earth analogue – lake La Cruz. We propose that obligate mineral-syntrophy is an ancestral interspecies interaction established before complex membrane structures and enzymes evolved to intermediate direct or indirect associations between species with distinct metabolism.

## Acknowledgements

This work is a contribution to a Danish Research Council grant 1325-00022 awarded to AER. During the writing of this manuscript, AER has been supported by three other grants: a Sapere Aude grant from Danish Research Council (4181-00203), a Novo Nordisk Foundation award and an Innovationsfonden grant (4106-00017), CRL was supported by the EU's H2020 program (#704272, NITROX). NP thanks the Seventh Framework Programme of the European Union Marie Skłodowska-Curie Intra-European Fellowships (BioCTrack 330064) for their support. JT acknowledges support from a NERC research studentship. We would like to acknowledge lab support by Lasse Ørum-Smidt, Erik Laursen, Heidi Grøn Jensen, Bente Hølbeck, and Susanne Møller.

## References

- Adam, P. S., Borrel, G., and Brochier-armanet, C. (2017). The growing tree of Archaea : new perspectives on their diversity, evolution and ecology. *ISME J.* 11, 2407–2425. doi:10.1038/ismej.2017.122.
- Adhikari, R. Y., Malvankar, N. S., Tuominen, M. T., and Lovley, D. R. (2016). Conductivity of individual *Geobacter pili*. *RSC Adv.* 6, 8354–8357. doi:10.1039/C5RA28092C.
- Ahn, J. ., Jeong, W.-S., Choi, M.-Y., Kim, B.-Y., Song, J., and Weon, H.-Y. (2014). Phylogenetic diversity of dominant Bacterial and Archaeal communities in plant-microbial fuel cells using rice plants. *J. Microbiol. Biotechnol.* 24, 1707–1718.
- Beckmann, S., Krüger, M., Engelen, B., Gorbushina, A. A., and Cypionka, H. (2011). Role of bacteria, archaea and fungi involved in methane release in abandoned coal mines. *Geomicrobiol. J.* 28, 347–358. doi:10.1080/01490451.2010.503258.
- Blaney, L. (2012). Magnetite (Fe<sub>3</sub>O<sub>4</sub>): properties, synthesis and applications. *Lehigh Rev.* 15–2007, 208–211. doi:10.1016/j.ceramint.2011.11.027.
- Bosch, J., Lee, K., Jordan, G., Kim, K., and Meckenstock, R. U. (2012). Anaerobic, nitrate-dependent oxidation of pyrite nanoparticles by *Thiobacillus denitrificans*. *Env. Sci Technol* 46, 2095–2101. doi:10.1021/es2022329.
- Bray, M. S., Wu, J., Reed, B. C., Kretz, C. B., Belli, K. M., Simister, R. L., et al. (2017). Shifting microbial communities sustain multiyear iron reduction and methanogenesis in ferruginous sediment incubations. *Geobiology* 15, 678–689. doi:10.1111/gbi.12239.
- Bura-Nakic, E., Viollier, E., Jézéquel, D., Thiam, A., and Ciglenecki, I. (2009). Reduced sulfur and iron species in anoxic water column of meromictic crater Lake Pavin (Massif Central, France). *Chem. Geol.* 266, 311–317. doi:10.1016/j.chemgeo.2009.06.020.
- Camacho, A., Miracle, R., Romero-viana, L., Picazo, A., and Vincente, E. (2017). “Lake La Cruz, an iron-rich karstic meromictic lake in central Spain,” in *Ecology of Meromictic Lakes*, 187–233. doi:10.1007/978-3-319-49143-1.
- Canfield, D. E., Raiswell, R., Westrich, J. T., Reaves, C. M., and Berner, R. A. (1986). The use of chromium reduction in the analysis of reduced inorganic sulfur in sediments and shales. *Chem. Geol.* 54, 149–155. doi:10.1016/0009-2541(86)90078-1.
- Caporaso, J. G., Kuczynski, J., Stombaugh, J., Bittinger, K., Bushman, F. D., Costello, E. K., et al. (2010). QIIME allows analysis of high-throughput community sequencing data. *Nat. Methods* 7, 335.
- Chen, S., Rotaru, A.-E., Shrestha, P. M., Malvankar, N. S., Liu, F., Fan, W., et al. (2014). Promoting interspecies electron transfer with biochar. *Sci. Rep.* 4, 5019. doi:10.1038/srep05019.



Chojnacka, A., and B, K. (2015). Noteworthy facts about a methane- producing microbial community processing acidic effluent from sugar beet molasses fermentation. *PLoS One*, 1–23. doi:10.1371/journal.pone.0128008.

Coman, C., Druga, B., Hegedus, A., Sicora, C., and Dragos, N. (2013). Archaeal and bacterial diversity in two hot spring microbial mats from a geothermal region in Romania. *Extremophiles* 17, 523–534. doi:10.1007/s00792-013-0537-5.

Crowe, S. A., Jones, C., Katsev, S., Neill, A. H. O., Sturm, A., Canfield, D. E., et al. (2008). Photoferrotrophs thrive in an Archean Ocean analogue. *Proc. Natl. Acad. Sci.* 105, 15938–15943.

Crowe, S. A., Katsev, S., Leslie, K., Sturm, A., Magen, C., Nomosatryo, S., et al. (2011). The methane cycle in ferruginous Lake Matano. *Geobiology* 9, 61–78. doi:10.1111/j.1472-4669.2010.00257.x.

Dinh, H. T., Kuever, J., Mußmann, M., Hassel, A. W., Mussman, M., Hassel, A. W., et al. (2004). Iron corrosion by novel anaerobic microorganisms. *Nature* 427, 829–832. doi:10.1038/nature02349.1.2.3.4.5.6.7.8.9.10.Wilson.

Dridi, B., Fardeau, M., Ollivier, B., Raoult, D., and Drancourt, M. (2012a). *Methanomassiliicoccus luminyensis* gen. nov., sp. nov., a methanogenic archaeon isolated from human faeces. *Int. J. Syst. Evol. Microbiol.* 62, 1902–1907. doi:10.1099/ijs.0.033712-0.

Dridi, D. I. S., Henry, M., Moulin, J., Cedex, M., and Drancourt, M. (2012b). Age-related prevalence of *Methanomassiliicoccus luminyensis* in the human gut microbiome. *Acta Pathol. Microbiol. Immunol. Scand.* 120, 773–777. doi:10.1111/j.1600-0463.2012.02899.x.

Duba, A. G. (1977). Electrical conductivity of coal and coal char. *Fuel* 56, 441–443.

Embree, M., Nagarajan, H., Movahedi, N., Chitsaz, H., and Zengler, K. (2014). Single-cell genome and metatranscriptome sequencing reveal metabolic interactions of an alkane-degrading methanogenic community. *ISME J.* 8, 757–67. doi:10.1038/ismej.2013.187.

Gregory, K. B., Bond, D. R., and Lovley, D. R. (2004). Graphite electrodes as electron donors for anaerobic respiration. *Environ. Microbiol.* 6, 596–604. doi:10.1111/j.1462-2920.2004.00593.x.

Guo, W., Xie, W., Li, X., Wang, P., Hu, A., and Zhang, C. L. (2018). Environmental factors shaping the archaeal community structure and ether lipid distribution in a subtropic river and estuary, China. *Appl. Microbiol. Biotechnol.* 102, 461–474.

Guskos, N., Papadopoulos, G. J., Likodimos, V., Patapis, S., Yarmis, D., Przepiera, A., et al. (2002). Photoacoustic, EPR and electrical conductivity investigations of three synthetic mineral pigments: hematite, goethite and magnetite. *Mater. Res. Bull.* 37, 1051–1061.

doi:10.1016/S0025-5408(02)00742-0.

He, S., Stevens, S. L. R., Chan, L.-K., Bertliss, S., Glavina del Rio, T., Tringe, S. G., et al. (2017). Ecophysiology of freshwater Verrucomicrobia inferred from metagenome-assembled genomes. *mSphere* 2, 1–17. Available at: <https://doi.org/10.1128/mSphere.00277-17>.

Holmes, D. E., Shrestha, P. M., Walker, D. J. F., Dang, Y., Kelly, P., Woodard, T. L., et al. (2017). Metatranscriptomic evidence for direct interspecies electron transfer between *Geobacter* and *Methanoxanthus* species in methanogenic rice paddy. *Appl. Environ. Microbiol.* 2. doi:10.1128/AEM.00223-17.

Kadnikov, V. V., Frank, Y. A., Mardanov, A. V., Beletsky, A. V., Ivasenko, D. A., and Pimenov, N. V (2017). Variability of the composition of the microbial community of the deep subsurface thermal aquifer in western Siberia. *Microbiology* 86, 765–772. doi:10.1134/S002626171706008X.

Kastening, B., Hahn, M., Rabanus, B., Heins, M., and Felde, U. (1997). Electronic properties and double layer of activated carbon. *Electrochim. Acta* 42, 2789–2800.

Kato, S., Hashimoto, K., and Watanabe, K. (2012). Microbial interspecies electron transfer via electric currents through conductive minerals. *Proc. Natl. Acad. Sci.* 109, 10042–10046. doi:10.1073/pnas.1117592109.

Kato, S., and Igarashi, K. (2018). Enhancement of methanogenesis by electric syntrophy with biogenic iron-sulfide minerals. *Microbiol. Open*, e00647. doi:10.1002/mbo3.647.

Kawaichi, S., Ito, N., Kamikawa, R., Sugawara, T., Yoshida, T., and Sako, Y. (2013). *Ardenticatena* *maritima* gen. nov., sp. nov., a ferric iron- and nitrate-reducing bacterium of the phylum ‘Chloroflexi’ isolated from an iron-rich coastal hydrothermal field, and description of *Ardenticatena* classis nov. *Int. J. Syst. Evol. Microbiol.* 63, 2992–3002. doi:10.1099/ijs.0.046532-0.

Kawaichi, S., Yamada, T., Umezawa, A., McGlynn, S., Suzuki, T., Dohmae, N., et al. (2018). Anodic and cathodic extracellular electron transfer by the filamentous bacterium *Ardenticatena* *maritima*. *Front. Microbiol.* 9, 1–11. doi:10.3389/fmicb.2018.00068.

Kearse, M., Moir, R., Wilson, A., Stones-Havas, S., Cheung, M., Sturrock, S., et al. (2012). Geneious Basic: an integrated and extendable desktop software platform for the organization and analysis of sequence data. *Bioinformatics* 28, 1647–1649. doi:10.1093/bioinformatics/bts199.

Klindworth, A., Pruesse, E., Schweer, T., Peplies, J., Quast, C., Horn, M., et al. (2013). Evaluation of general 16S ribosomal RNA gene PCR primers for classical and next-generation sequencing-based diversity studies. *Nucleic Acids Res.* 41, 1–11. doi:10.1093/nar/gks808.

589 Kondo, K., Okamoto, A., Hashimoto, K., and Nakamura, R. (2015). Sulfur-mediated electron  
590 shuttling sustains microbial long-distance extracellular electron transfer with the aid of  
591 metallic iron sulfides. *Langmuir* 31, 7427–7434. doi:10.1021/acs.langmuir.5b01033.

592 Kuroda, K., and Hatamoto, M. (2015). Community composition of known and uncultured  
593 Archaeal lineages in anaerobic or anoxic wastewater treatment sludge. *Microb. Ecol.* 69,  
594 586–596. doi:10.1007/s00248-014-0525-z.

595 Lair, V., Antony, H., Legrand, L., and Chaussé, A. (2006). Electrochemical reduction of ferric  
596 corrosion products and evaluation of galvanic coupling with iron. *Corros. Sci.* 48, 2050–  
597 2063. doi:10.1016/j.corsci.2005.06.013.

598 Lane, N., and Martin, W. F. (2012). The origin of membrane bioenergetics. *Cell* 151, 1406–  
599 1416. doi:10.1016/j.cell.2012.11.050.

600 Lawson, P. A., Wawrik, B., Allen, T. D., Johnson, C. N., Marks, C. R., Tanner, R. S., et al.  
601 (2014). *Youngiibacter fragilis* gen. nov., sp. nov., isolated from natural gas production-  
602 water and reclassification of *Acetivibrio multivorans* as *Youngiibacter multivorans*  
603 comb. nov. *Int. J. Syst. Evol. Microbiol.* 64, 198–205. doi:10.1099/ijls.0.053728-0.

604 Liu, F., Rotaru, A.-E., Shrestha, P. M., Malvankar, N. S., Nevin, K. P., and Lovley, D. R.  
605 (2012). Promoting direct interspecies electron transfer with activated carbon. *Energy*  
606 *Environ. Sci.* 5, 8982. doi:10.1039/c2ee22459c.

607 Liu, F., Rotaru, A.-E., Shrestha, P. M., Malvankar, N. S., Nevin, K. P., and Lovley, D. R.  
608 (2015). Magnetite compensates for the lack of a pilin-associated c-type cytochrome in  
609 extracellular electron exchange. *Environ. Microbiol.* 17, 648–55. doi:10.1111/1462-  
610 2920.12485.

611 Liu, Y., Sieprawska-Lupa, M., Whitman, W. B., and White, R. H. (2010). Cysteine is not the  
612 sulfur source for iron-sulfur cluster and methionine biosynthesis in the methanogenic  
613 archaeon *Methanococcus maripaludis*. *J. Biol. Chem.* 285, 31923–31929.  
614 doi:10.1074/jbc.M110.152447.

615 Llíros, M., García-Armisen, T., Darchambeau, F., Morana, C., Triadó-Margarit, X., Inceoglu,  
616 Ö., et al. (2015). Pelagic photoferrotrophy and iron cycling in a modern ferruginous  
617 basin. *Sci. Rep.* 5, 13803. doi:10.1038/srep13803.

618 López-García, P., and Moreira, D. (1999). Metabolic symbiosis at the origin of eukaryotes.  
619 *Trends Biochem. Sci.* 24, 88–93.

620 Lovley, D. R., and Phillips, E. J. P. (1987). Rapid assay for microbially reducible ferric iron  
621 in aquatic sediments. *Appl. Environ. Microbiol.* 53, 1536–1540.

622 Lovley, D. R., Roden, E. E., Phillips, E. J. P., and Woodward, J. C. (1993). Enzymatic iron  
623 and uranium reduction by sulfate-reducing bacteria. *Mar. Geol.* 113, 41–53.

624 Mahadevan, A., and Fernando, S. (2018). Inorganic iron-sulfur clusters enhance electron

transport when used for wiring the NAD-glucose dehydrogenase based redox system.

*Microchim. Acta* 2, 1–8.

Martin, W., Russell, M. J., Horner, D., Blankenship, R., Cavalier-Smith, T., and Nisbet, E. (2003). On the origins of cells : a hypothesis for the evolutionary transitions from abiotic geochemistry to chemoautotrophic prokaryotes, and from prokaryotes to nucleated cells. *Philos. Trans. R. Soc. London B* 358, 59–85. doi:10.1098/rstb.2002.1183.

Merkel, A. Y., Podosokorskaya, O. A., Chernyh, N. A., and Osmolovskaya, E. A. B. (2015). Occurrence, diversity, and abundance of methanogenic Archaea in terrestrial hot springs of Kamchatka and Sao Miguel island. *Microbiology* 84, 577–583. doi:10.1134/S002626171504013X.

Merkel, A. Y., Podosokorskaya, O. A., and Sokolova, T. G. (2016). Diversity of methanogenic Archaea from the 2012 terrestrial hot Spring (valley of geysers, Kamchatka ). *Microbiology* 85, 342–349. doi:10.1134/S0026261716030073.

Milner-White, E. J., and Russell, M. J. (2005). Sites for phosphates and iron-sulfur thiolates in the first membranes: 3 to 6 residue anion-binding motifs (nests). *Orig. Life Evol. Biosph.* 35, 19–27.

Miracle, M. R., Vicente, E., and Pedros-Alio, C. (1992). Biological studies of spanish meromictic and stratified karstic lakes. *Limnetica* 8, 59–77.

Moreira, D., and Lopez-Garcia, P. (1998). Symbiosis between methanogenic Archaea and delta-Proteobacteria as the origin of Eukaryotes : the syntrophic hypothesis. *J. Mol. Evol.* 47, 517–530.

Morita, M., Malvankar, N. S., Franks, A. E., Summers, Z. M., Giloteaux, L., Rotaru, A. E., et al. (2011). Potential for direct interspecies electron transfer in methanogenic wastewater digester aggregates. *MBio* 2, e00159-11. doi:10.1128/mBio.00159-11.

Nakasono, S., Matsumoto, N., and Saiki, H. (1997). Electrochemical cultivation of *Thiobacillus ferrooxidans* by potential control. *Bioelectrochemistry Bioenerg.* 43, 61–66.

Nordi, K. Á., Thamdrup, B., and Schubert, C. J. (2013). Anaerobic oxidation of methane in an iron-rich Danish freshwater lake sediment. *Limnol. Oceanogr.* 58, 546–554. doi:10.4319/lo.2013.58.2.0546.

Nunoura, T., Takaki, Y., Shimamura, S., Kakuta, J., Kazama, H., Hirai, M., et al. (2016). Variance and potential niche separation of microbial communities in subseafloor sediments off Shimokita Peninsula, Japan. *Environ. Microbiol.* 18, 1889–1906. doi:10.1111/1462-2920.13096.

Oswald, K., Jegge, C., Tischer, J., Berg, J., Brand, A., Miracle, M. R., et al. (2016). Methanotrophy under versatile conditions in the water column of the ferruginous

meromictic lake La Cruz ( Spain ). *Front. Microbiol.* 7, 1–16.  
doi:10.3389/fmicb.2016.01762.

Park, J., Lee, B., Shi, P., Kwon, H., Jeong, S., and Jun, H. (2018). Methanol metabolism and  
archaeal community changes in a bioelectrochemical anaerobic digestion sequencing  
batch reactor with copper-coated graphite cathode. *Bioresour. Technol.* 259, 398–406.  
doi:10.1016/j.biortech.2018.03.009.

Parkhomenko, E. I. (1990). “Electrical properties of rocks and minerals,” in *Electrical  
properties of rocks* (Cambridge: Cambridge University Press).

Paul, K., Nonoh, J. O., Mikulski, L., and Brune, A. (2012). “Methanoplasmatales,”  
Thermoplasmatales-related Archaea in termite guts and other environments, are the  
seventh order of methanogens. *Appl. Environ. Microbiol.* 78, 8245–8253.  
doi:10.1128/AEM.02193-12.

Pearce, C. I., Patrick, A. D., and Vaughan, D. J. (2006). Electrical and magnetic properties of  
sulfides. *Rev. Mineral. Geochemistry* 61, 127–180. doi:10.2138/rmg.2006.61.3.

Phillips, E. J. P., and Lovley, D. R. (1987). Determination of Fe(III) and Fe(II) in oxalate  
extracts of sediment. *Soil Sci. Soc. Am. J.* 51, 938–941.

Posth, N. R., Bristow, L. A., Cox, R. P., Habicht, K. S., Danza, F., Tonolla, M., et al. (2017).  
Carbon isotope fractionation by anoxygenic phototrophic bacteria in euxinic Lake  
Cadagno. *Geobiology* 15, 798–816. doi:10.1111/gbi.12254.

Poulton, S. W., and Canfield, D. E. (2005). Development of a sequential extraction procedure  
for iron: Implications for iron partitioning in continentally derived particulates. *Chem.  
Geol.* 214, 209–221. doi:10.1016/j.chemgeo.2004.09.003.

Poulton, S. W., Krom, M. D., and Raiswell, R. (2004). A revised scheme for the reactivity of  
iron (oxyhydr)oxide minerals towards dissolved sulfide. *Geochim. Cosmochim. Acta* 68,  
3703–3715. doi:10.1016/j.gca.2004.03.012.

Poulton, S. W., and Raiswell, R. (2002). The low-temperature geochemical cycle of iron:  
from continental fluxes to marine sediment deposition. *Am. J. Sci.* 302, 774–805.

Pous, N., Koch, C., Colprim, J., Puig, S., and Harnisch, F. (2014). Extracellular electron  
transfer of biocathodes : revealing the potentials for nitrate and nitrite reduction of  
denitrifying microbiomes dominated by *Thiobacillus* sp . *Electrochem. commun.* 49, 93–  
97. doi:10.1016/j.elecom.2014.10.011.

Raiswell, R., and Canfield, D. E. (1998). Sources of Fe for pyrite formation in marine  
sediments. *Am. J. Sci.* 298, 219–245. doi:10.2475/ajs.298.3.219.

Raymann, K., Moeller, A. H., and Goodman, A. L. (2017). Unexplored Archaeal diversity in  
the great ape gut microbiome. *mSphere* 2, 1–12.

Rochelle, C. M., and Schwertmann, U. (2003). “The iron oxides: structure, properties,

697 reactions, occurrences and uses,” in *The iron oxides: structure, properties, reactions,*  
698 *occurrences and uses*, 5–18.

699 Romero-Viana, L., Julià, R., Schimmel, M., Camacho, A., Vicente, E., and Miracle, M. R.  
700 (2011). Reconstruction of annual winter rainfall since A.D.1579 in central-eastern Spain  
701 based on calcite laminated sediment from Lake La Cruz. *Clim. Change* 107, 343–361.  
702 doi:10.1007/s10584-010-9966-7.

703 Rotaru, A.-E. A.-E., Shrestha, P. M. P. M., Liu, F., Shrestha, M., Shrestha, D., Embree, M., et  
704 al. (2014a). A new model for electron flow during anaerobic digestion: direct  
705 interspecies electron transfer to *Methanosaeta* for the reduction of carbon dioxide to  
706 methane. *Energy Environ. Sci.* 7, 408. doi:10.1039/c3ee42189a.

707 Rotaru, A.-E., Calbrese, F., Stryhanyuk, H., Musat, F., Shrestha, P. M., Weber, H. S., et al.  
708 (2018). Conductive particles enable syntrophic acetate oxidation between *Geobacter* and  
709 *Methanosarcina* from coastal sediments. *MBio* 9, 1–14.

710 Rotaru, A.-E., Shrestha, P. M., Liu, F., Markovaite, B., Chen, S., Nevin, K. P., et al. (2014b).  
711 Direct interspecies electron transfer between *Geobacter metallireducens* and  
712 *Methanosarcina barkeri*. *Appl. Environ. Microbiol.* 80, 4599–605.  
713 doi:10.1128/AEM.00895-14.

714 Rotaru, A.-E., Woodard, T. L., Nevin, K. P., and Lovley, D. R. (2015). Link between capacity  
715 for current production and syntrophic growth in *Geobacter* species. *Front. Microbiol.* 6,  
716 744. doi:10.3389/fmicb.2015.00744.

717 Rout, S. P., Charles, C. J., Garratt, E. J., Laws, A. P., Gunn, J., and Humphreys, P. N. (2015).  
718 Evidence of the generation of isosaccharinic acids and their subsequent degradation by  
719 local microbial consortia within hyper-alkaline contaminated soils, with relevance to  
720 intermediate level radioactive waste disposal. *PLoS One*, 1–13.  
721 doi:10.1371/journal.pone.0119164.

722 Russell, M. J., Daniel, R. M., Hall, A. J., and Sherringham, J. A. (1994). A hydrothermally  
723 precipitated catalytic iron sulphide membrane as a first step toward life. *J. Mol. Evol.* 39,  
724 231–243. doi:10.1007/BF00160147.

725 Russell, M. J., Hall, A. J., and Gize, A. P. (1990). Pyrite and the origin of life. *Nature* 344,  
726 387.

727 Salgado-Flores, A., Bockwoldt, M., Hagen, L. H., Pope, P. B., and Sundset, A. (2018). First  
728 insight into the faecal microbiota of the high Arctic muskoxen (*Ovibos moschatus* ).  
729 *Microb. Genomics*, 1–11. doi:10.1099/mgen.0.000066.

730 Shrestha, P. M., and Rotaru, A.-E. (2014). Plugging in or going wireless: strategies for  
731 interspecies electron transfer. *Front. Microbiol.* 5, 237. doi:10.3389/fmicb.2014.00237.

732 Shrestha, P. M., Rotaru, A.-E., Summers, Z. M., Shrestha, M., Liu, F., and Lovley, D. R.



733 (2013). Transcriptomic and genetic analysis of direct interspecies electron transfer. *Appl.*  
734 *Environ. Microbiol.* 79, 2397–404. doi:10.1128/AEM.03837-12.

735 Söllinger, A., Schwab, C., Schwab, C., Weinmaier, T., Loy, A., Tveit, A. T., et al. (2016).  
736 Phylogenetic and genomic analysis of Methanomassiliicoccales in wetlands and animal  
737 intestinal tracts reveals clade-specific habitat preferences. *FEMS Microbiol. Ecol.* 92.  
738 doi:10.1093/femsec/fiv149.

739 Stookey, L. L. (1970). Ferrozine-a new spectrophotometric reagent for iron. *Anal. Chem.* 42,  
740 779–781. doi:10.1021/ac60289a016.

741 Summers, Z. M., Fogarty, H. E., Leang, C., Franks, A. E., Malvankar, N. S., and Lovley, D.  
742 R. (2010). Direct exchange of electrons within aggregates of an evolved syntrophic  
743 coculture of anaerobic bacteria. *Science* 330, 1413–1415. doi:10.1126/science.1196526.

744 Tanaka, K., Nakamura, K., and Mikami, E. (1991). Fermentation of cinnamate by a  
745 mesophilic strict anaerobe, *Acetivibrio multivorans* sp. nov. *Arch. Microbiol.* 155, 120–  
746 124.

747 Thompson, J. (2018). Iron and phosphorus cycling under ferruginous conditions. *Ph.D.*  
748 *Thesis*.

749 Ueki, T., Nevin, K. P., Rotaru, A.-E., Wang, L., Ward, J. E., Woodard, T. L., et al. (2018).  
750 *Geobacter* strains expressing poorly conductive pili reveal constraints on direct  
751 interspecies electron transfer. *MBio* 9. doi:10.1128/mBio.01273-18.

752 Vigneron, A., Alsop, E. B., Chambers, B., Lomans, B. P., and Head, I. M. (2016).  
753 Complementary microorganisms in highly corrosive biofilms from an offshore oil  
754 production facility. *Appl. Environ. Microbiol.* 82, 2545–2554. doi:10.1128/AEM.03842-  
755 15.Editor.

756 Vincente, E., and Miracle, M. (1988). Physicochemical and microbial stratification in a  
757 meromictic karstic lake of Spain. *Verh. Internat. Verein. Limnol.* 23, 522–529.

758 Viollier, E., Inglett, P. W., Hunter, K., Roychoudhury, a N., and Van Cappellen, P. (2000).  
759 The ferrozine method revisited: Fe (II)/Fe (III) determination in natural waters. *Appl.*  
760 *Geochemistry* 15, 785–790. doi:10.1016/S0883-2927(99)00097-9.

761 Wächtershäuser, G. (1988a). Before enzymes and templates: theory of surface metabolism.  
762 *Microbiol. Rev.* 52, 452–484.

763 Wächtershäuser, G. (1988b). Pyrite Formation, the First Energy Source for Life: a  
764 Hypothesis. *Syst. Appl. Microbiol.* 10, 207–210. doi:10.1016/S0723-2020(88)80001-8.

765 Walker, D. J. F., Adhikari, R. Y., Holmes, D. E., Ward, J. E., Trevor, L., Nevin, K. P., et al.  
766 (2018). Electrically conductive pili from pilin genes of phylogenetically diverse  
767 microorganisms. *ISME J.* 12, 48–58. doi:10.1038/ismej.2017.141.

768 Walter, X. A., Picazo, A., Miracle, M. R., Vicente, E., Camacho, A., Aragno, M., et al.



769 (2014). Phototrophic Fe(II)-oxidation in the chemocline of a ferruginous meromictic  
770 lake. *Front. Microbiol.* 5, 1–9. doi:10.3389/fmicb.2014.00713.

771 Wang, L., Nevin, K. P., Woodard, T. L., Mu, B., and Lovley, D. R. (2016). Expanding the  
772 diet for DIET: Electron donors supporting direct interspecies electron transfer (DIET) in  
773 defined co-cultures. *Front. Microbiol.* 7, 1–7. doi:10.3389/fmicb.2016.00236.

774 Wang, O., Zheng, S., Wang, B., and Wang, W. (2018). Necessity of electrically conductive  
775 pili for methanogenesis with magnetite stimulation. *PeerJ* 2, 1–14.  
776 doi:10.7717/peerj.4541.

777 Zegeye, A., Bonneville, S., Benning, L. G., Sturm, A., Fowle, D. A., Jones, C. A., et al.  
778 (2012). Green rust formation controls nutrient availability in a ferruginous water  
779 column. *Geology* 40, 599–602. doi:10.1130/G32959.1.

780 Zheng, S., Wang, B., Liu, F., and Wang, O. (2017). Magnetite production and transformation  
781 in the methanogenic consortia from coastal riverine sediments. *J. Microbiol.* 55, 862–  
782 870. doi:10.1007/s12275-017-7104-1.

783

784

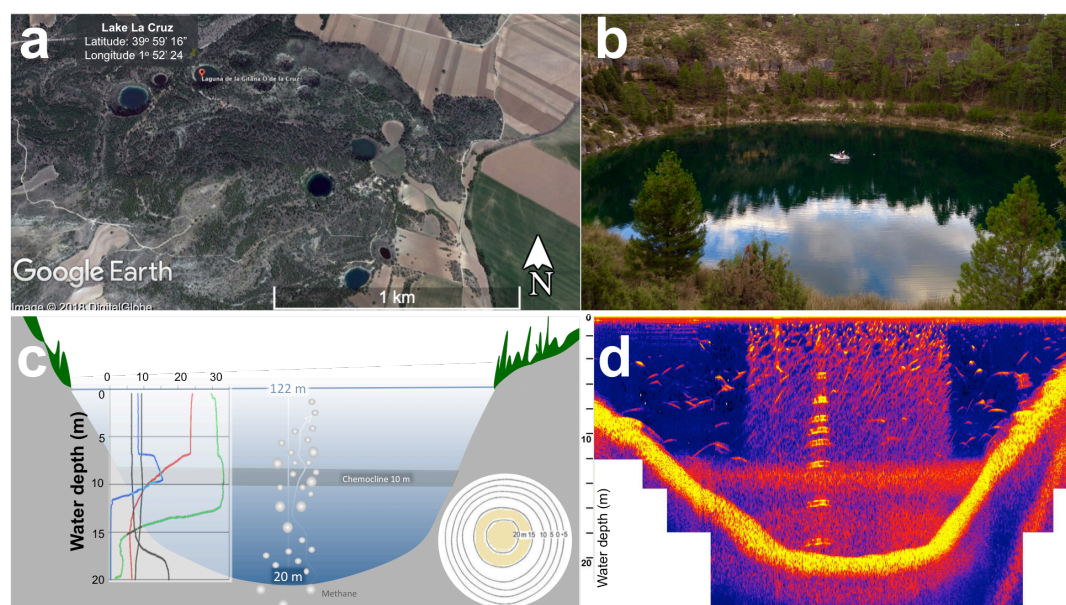

**Figure 1.**

Lake La Cruz with its geophysical features. Map of the Cuenca lake area with geographical coordinates (a); and an image of the sampling site - lake La Cruz (b). Schematic representation of the lake (c) including a bathymetric map (c-round inset), and *in situ* physico-chemical characteristics of the water column (c-graphic inset). An echogram indicating the chemocline from 10-12 m, with visible gas ebullition in the central area (d).

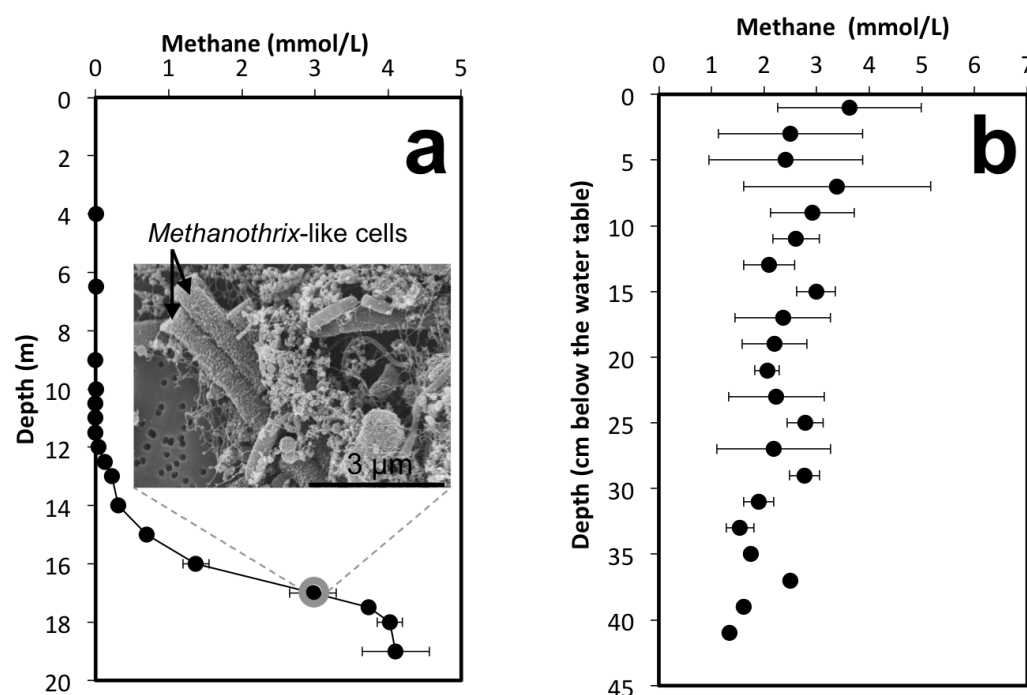

**Figure 2.**

Methane profiling through the water column and sediment of lake La Cruz. (a) In the water column of Lake La Cruz, the highest methane concentrations were below 17-m depth where *Methanothrix*-like cells (inset) could be observed by scanning electron microscopy. (b) Sediment cores showed very high methane concentrations especially in the top 15-cm, indicating that methane also has sedimentary origin. The water column average values are for triplicate samples taken at each specific water column depth; while values for sediments are from triplicate cores sampled every 2-cm.

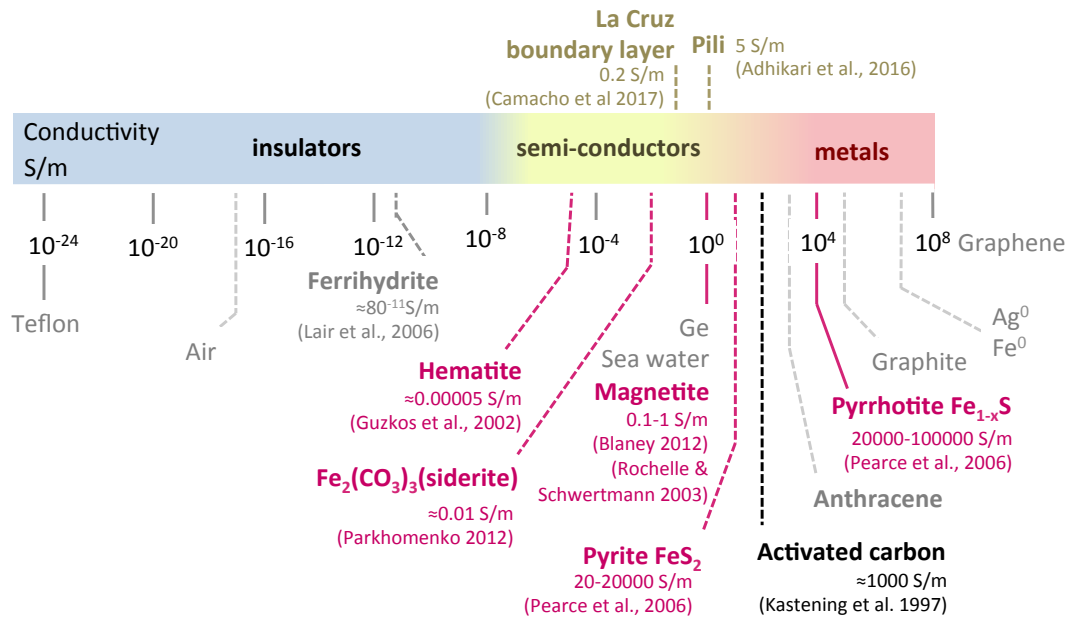

**Figure 3.**

Conductivities of various Fe-oxides and Fe-sulfides, compared to that of the e-pili and the conductivities observed for different carbon particles including activated carbon used in this study. We have also listed the conductivity measured in lake La Cruz at the sediment-water boundary layer. (Adhikari et al., 2016; Blaney, 2012; Camacho et al., 2017; Guskos et al., 2002; Kastening et al., 1997; Lair et al., 2006; Parkhomenko, 1990; Pearce et al., 2006; Rochelle and Schwertmann, 2003)

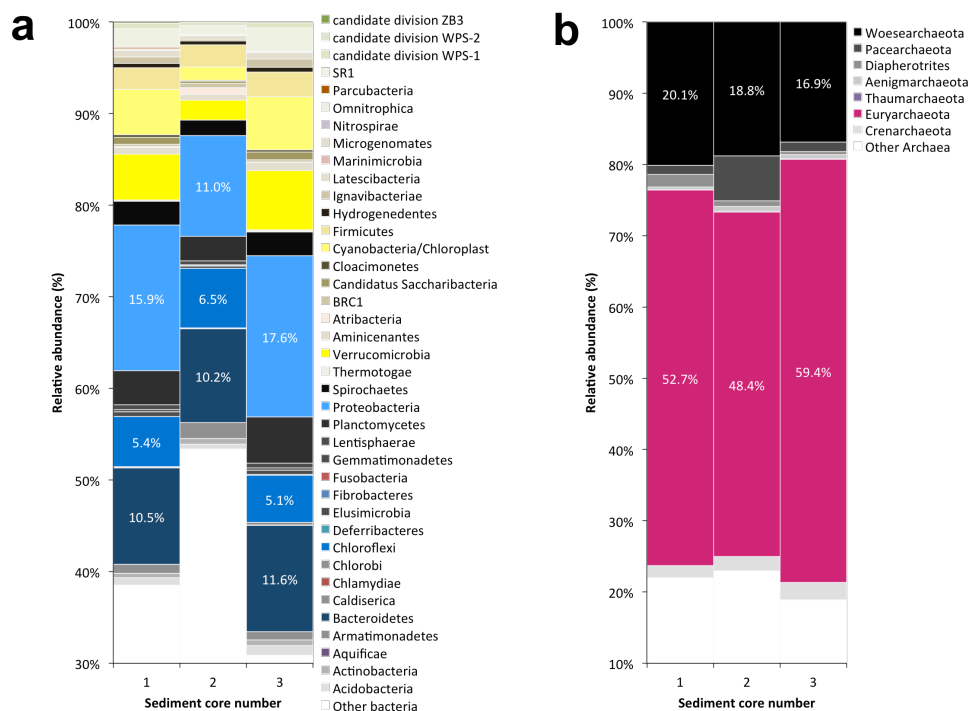

**Figure 4.**

Relative, phylum-level composition of (a) Bacteria and (b) Archaea harboring the top 16-cm of three sediment cores from lake LaCruz, as determined by 16S rRNA gene amplicon sequencing.

822

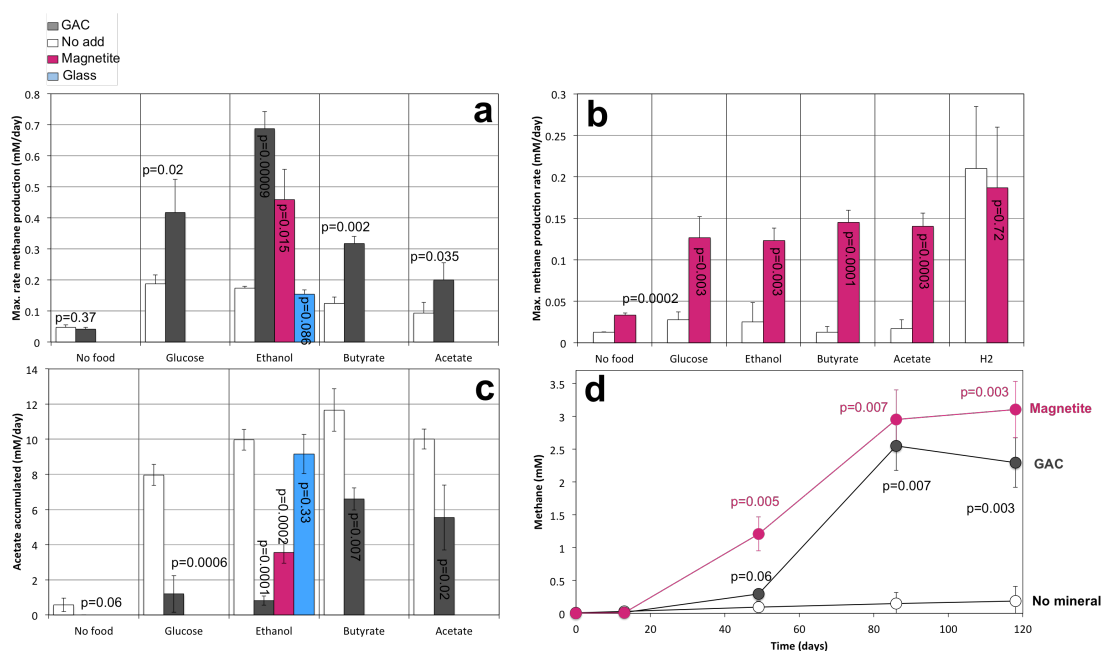

Figure 5.

Methanogenesis on different substrates in incubations from lake La Cruz.

Methane production in initial slurry incubations provided with different substrates was stimulated by conductive particles (GAC or magnetite) independent of the media used (a) modified DSMZ 120 or (b) DSMZ 334. (c) Acetate accumulated in incubations without conductive particles, but was significantly lower at the addition of conductive particles. (d) For example, a third transfer free of sediment showed that methanogenesis and acetate consumption were strictly dependent of the presence of conductive particles (colored symbols), and ceased if conductive particles were not added consistently for subsequent transfers (white symbols).

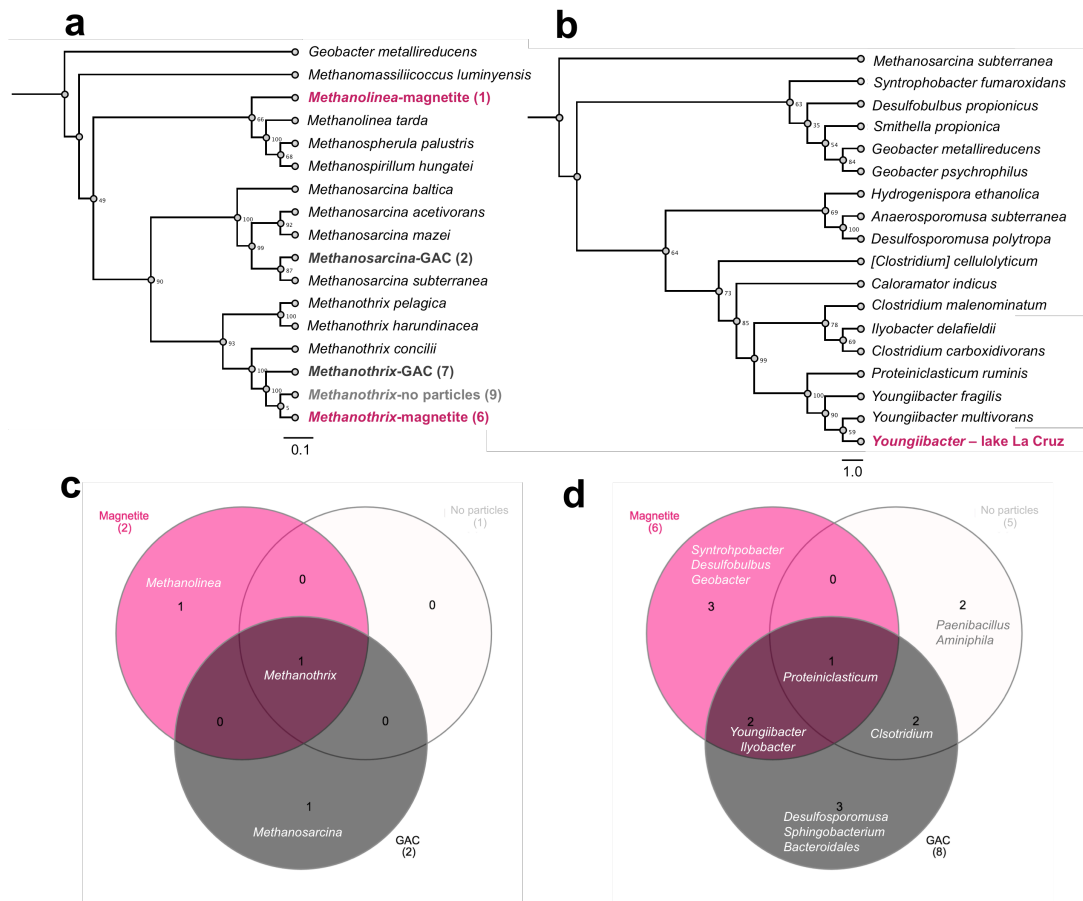

**Figure 6.**

Maximum likelihood phylogenetic trees (a, b) and venn diagrams with the relative distribution of 16S rRNA-gene sequences for Archaea (a, c) and Bacteria (b, d) in La Cruz incubations with or without conductive particles. Archaeal (a) and Bacterial (b) 16S rRNA genes were retrieved from third mud-free transfer of acetate- incubations with magnetite (pink), and GAC (black-bold) or from a first mud-free transfer without conductive particles (light gray-white). (c) The only Archaeal 16S phylotype encountered in all incubations independent of treatment was *Methanothrix*-related. (d) The most abundant Bacterial phylotype encountered only in conductive particle-amended incubations was *Youngiibacter*-related.



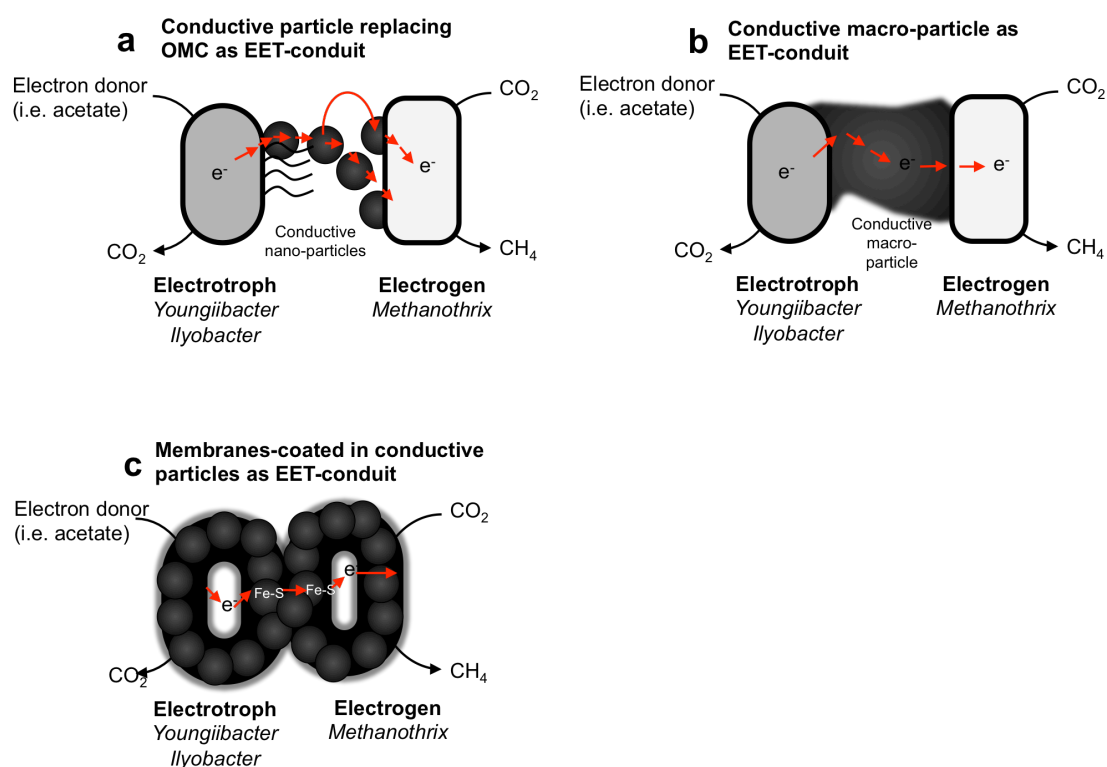

**Figure 7.**

Proposed model interspecies interactions in La Cruz sediments facilitated by conductive particles. (a) Syntrophy mediated by a conductive nano-particles replacing outer membrane cytochromes (OMCs). Nevertheless, pili involved in EET are still available. (b) Syntrophy mediated by a conductive macro-particle (i.e. GAC), which plays the role of both and electron plug and outlet. (c) Syntrophy mediated by a conductive-mineral coat padding the cell surface. In lake La Cruz, conductive minerals could for example result from the precipitation of  $\text{Fe}^{2+}$  as Fe-S/thiola- in the periplasmic space of cells. Cell surfaces encrusted with a metal-S coat such as Fe-S might endorse the electron-transfer between the two distinct metabolic entities even in the absence of a typical EET/DIET conduit.
